# Supplementary material for: Adaptation of ELISA detection of Plasmodium falciparum and Plasmodium vivax circumsporozoite proteins in mosquitoes to a multiplex bead-based immunoassay
Source: PubMed Central journal article supplement (PMC8461957; doi:10.1186/s12936-021-03910-z), 2021-09-23
Supplement: 12936_2021_3910_MOESM1_ESM.pdf [file 12936_2021_3910_MOESM1_ESM.pdf]

*P. falciparum*

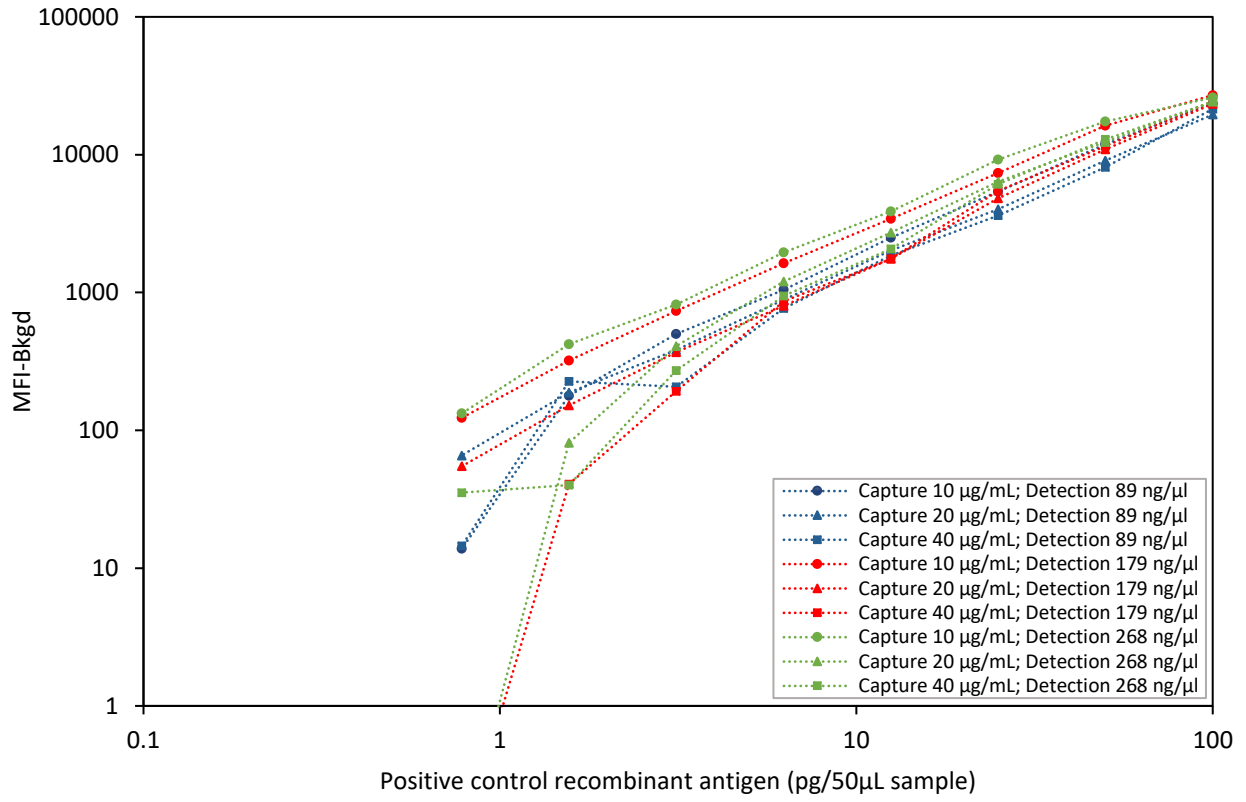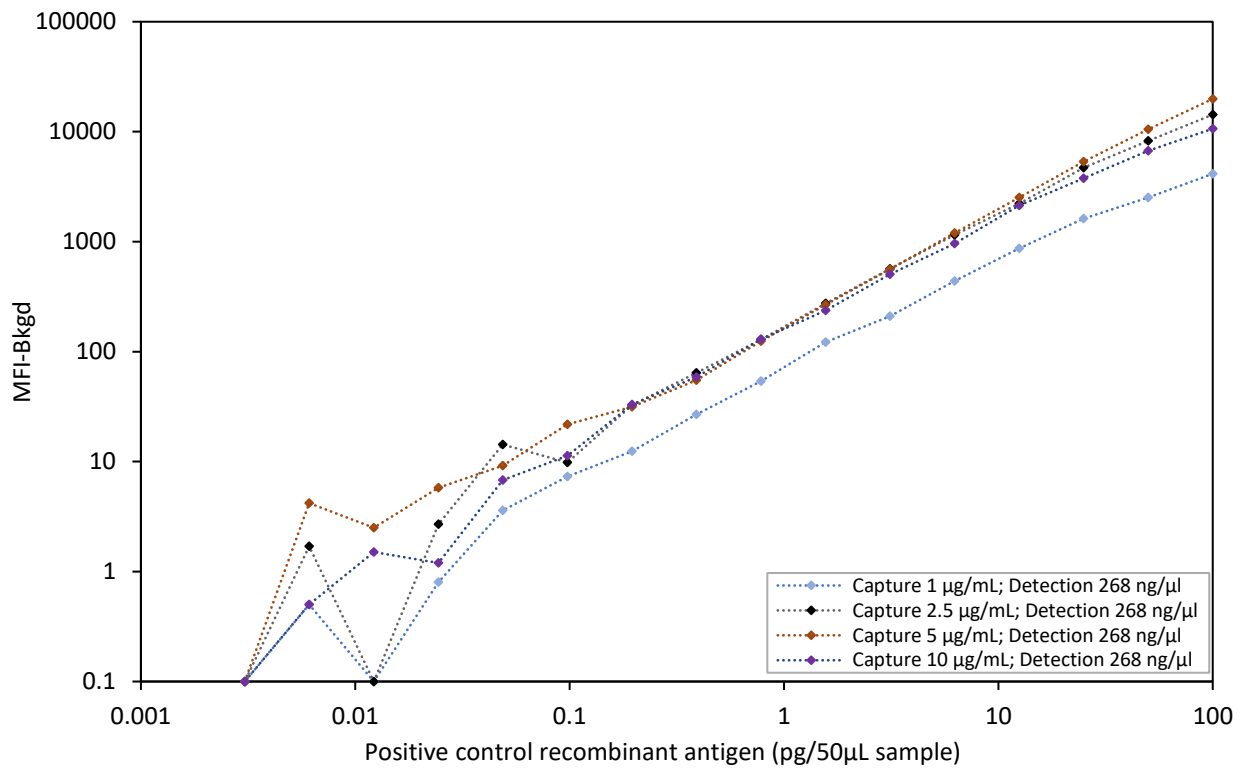

*P. vivax*210

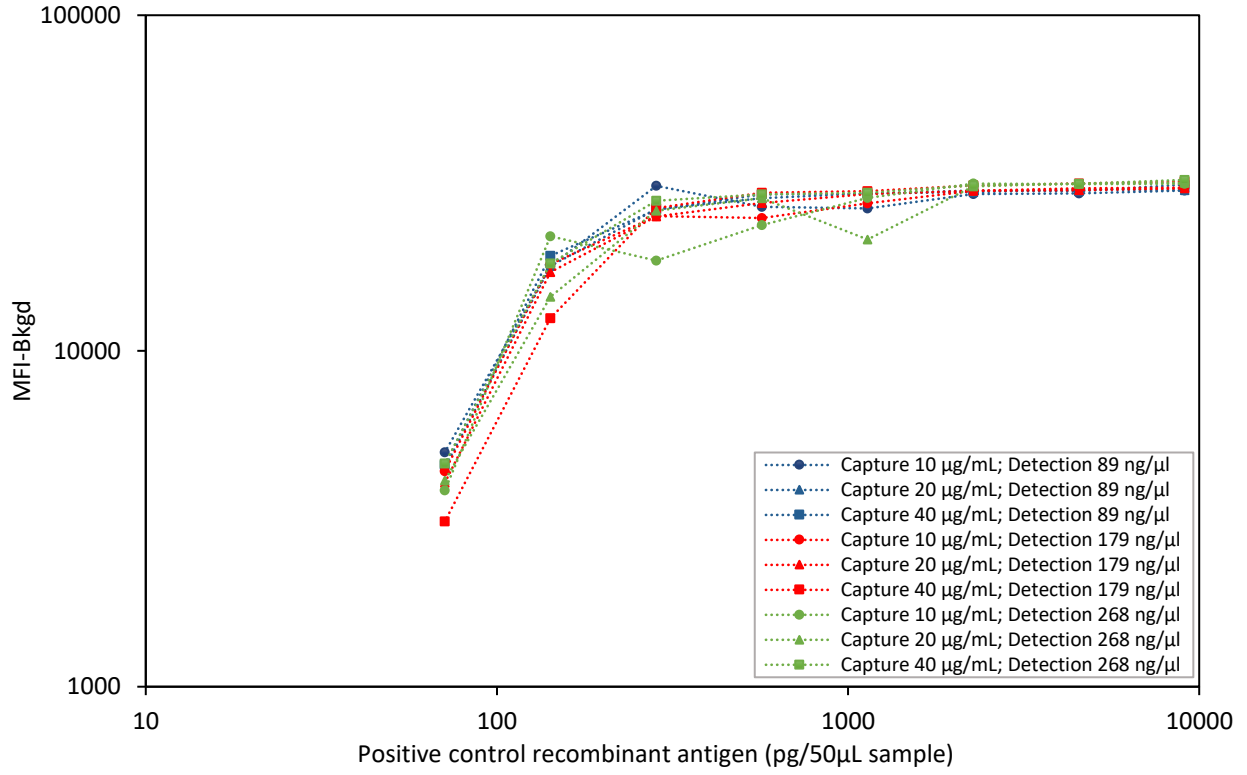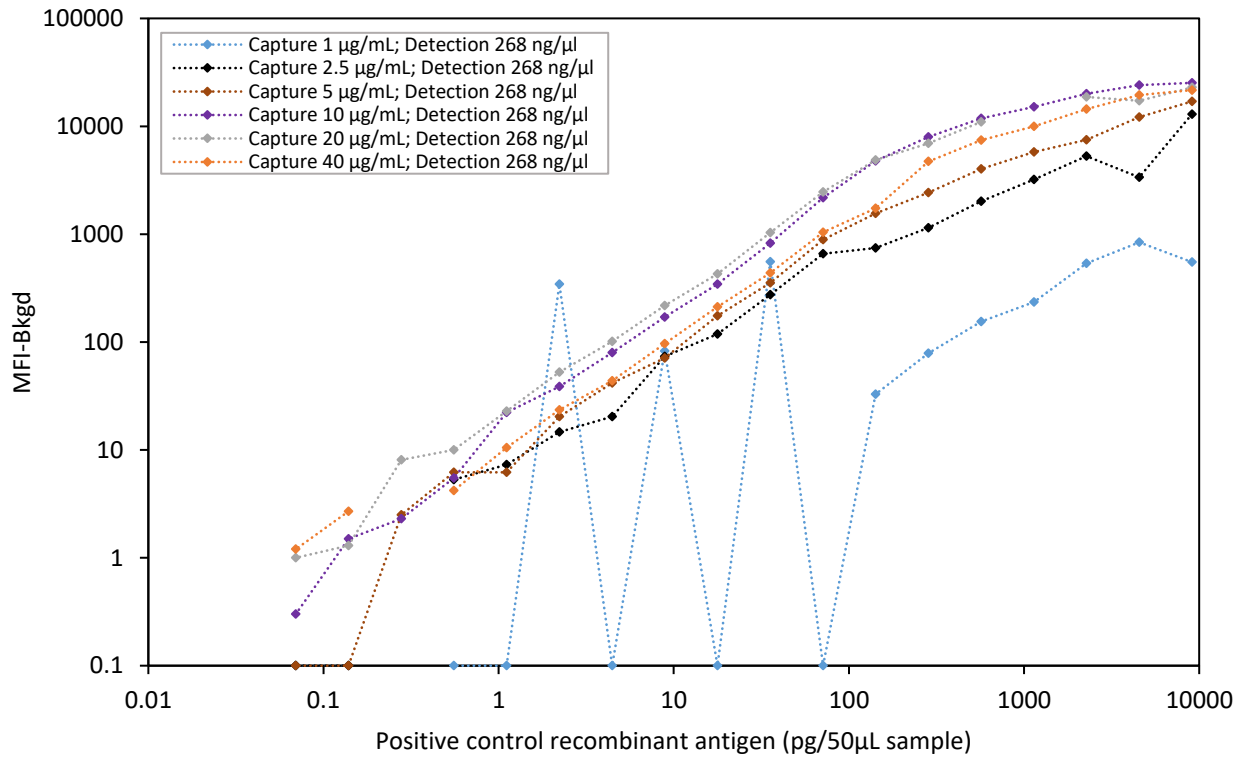

*P. vivax*247

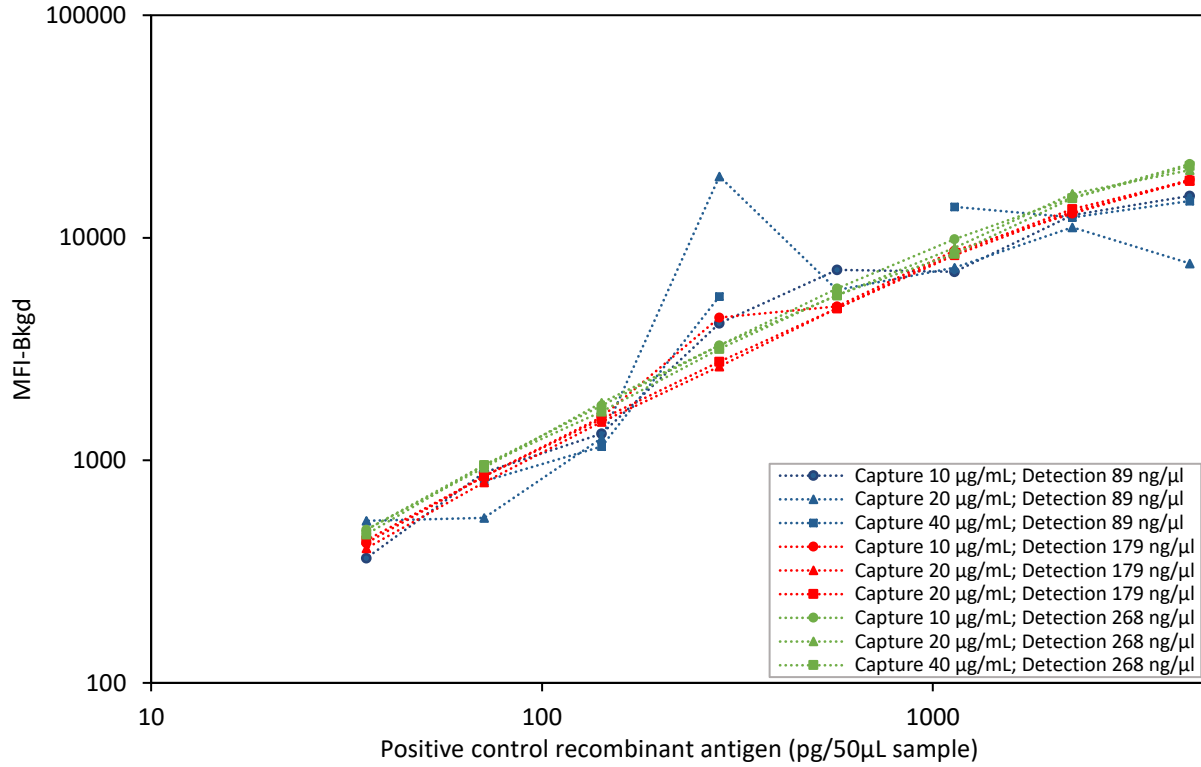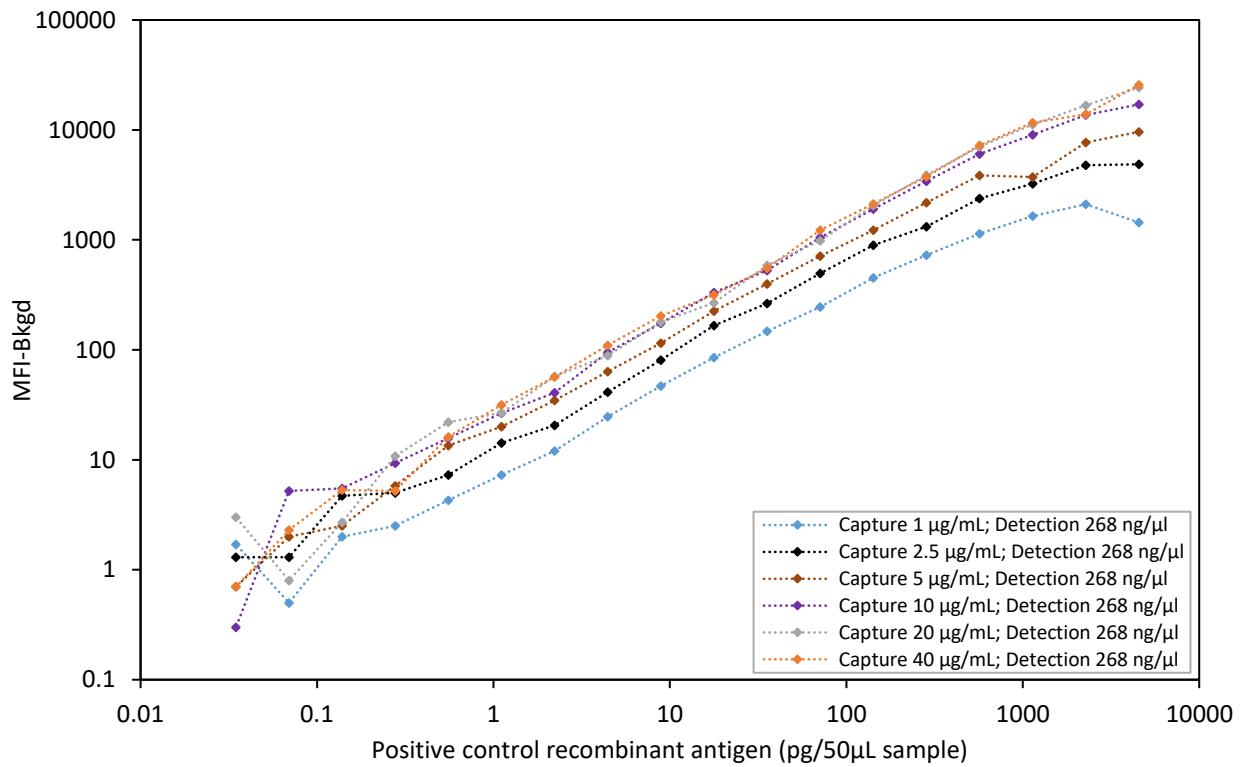

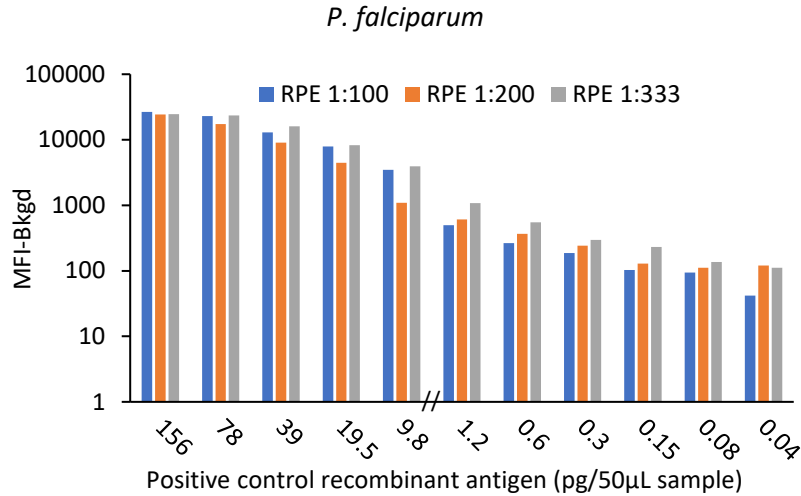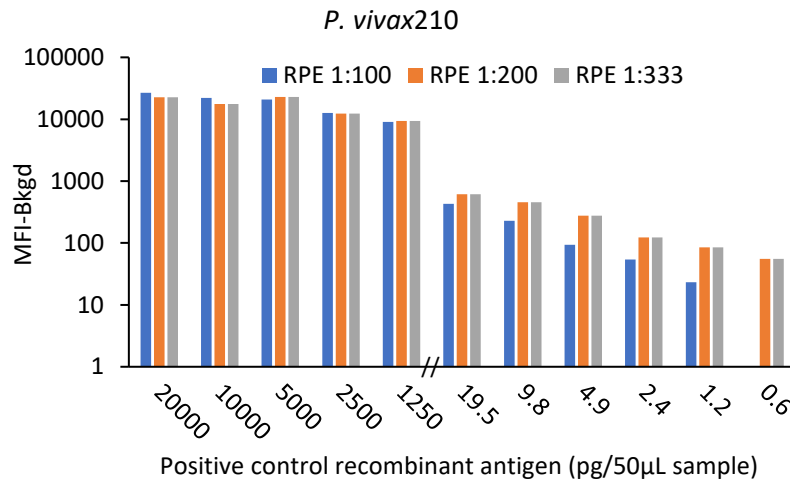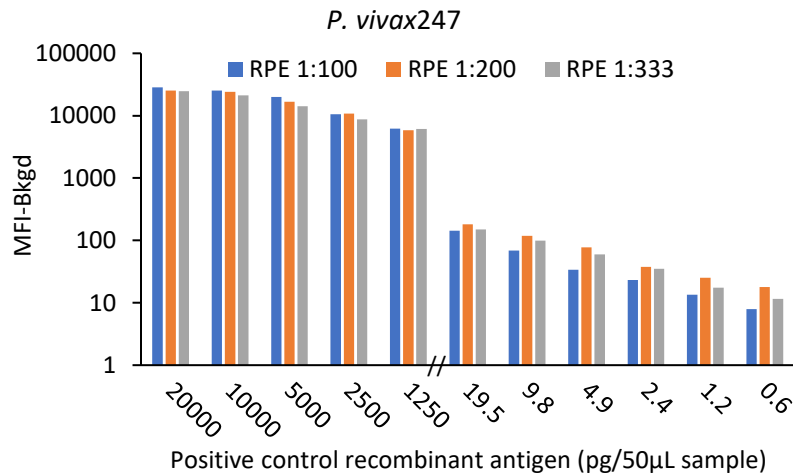

Additional file 1. Circumsporozoite (cs) multiplex-bead assay (MBA) median fluorescence intensity minus background (MFI-Bkgd) values of recombinant positive control antigen with varying *Plasmodium falciparum*, *P. vivax210* and *P. vivax247* capture and detection antibody concentrations and streptavidin-phycoerythrin (RPE) concentrations for selection of optimal conditions.
