# Supplementary material for: Adaptation of ELISA detection of Plasmodium falciparum and Plasmodium vivax circumsporozoite proteins in mosquitoes to a multiplex bead-based immunoassay
Source: PubMed Central journal article supplement (PMC8461957; doi:10.1186/s12936-021-03910-z), 2021-09-23
Supplement: 12936_2021_3910_MOESM2_ESM.pdf [file 12936_2021_3910_MOESM2_ESM.pdf]

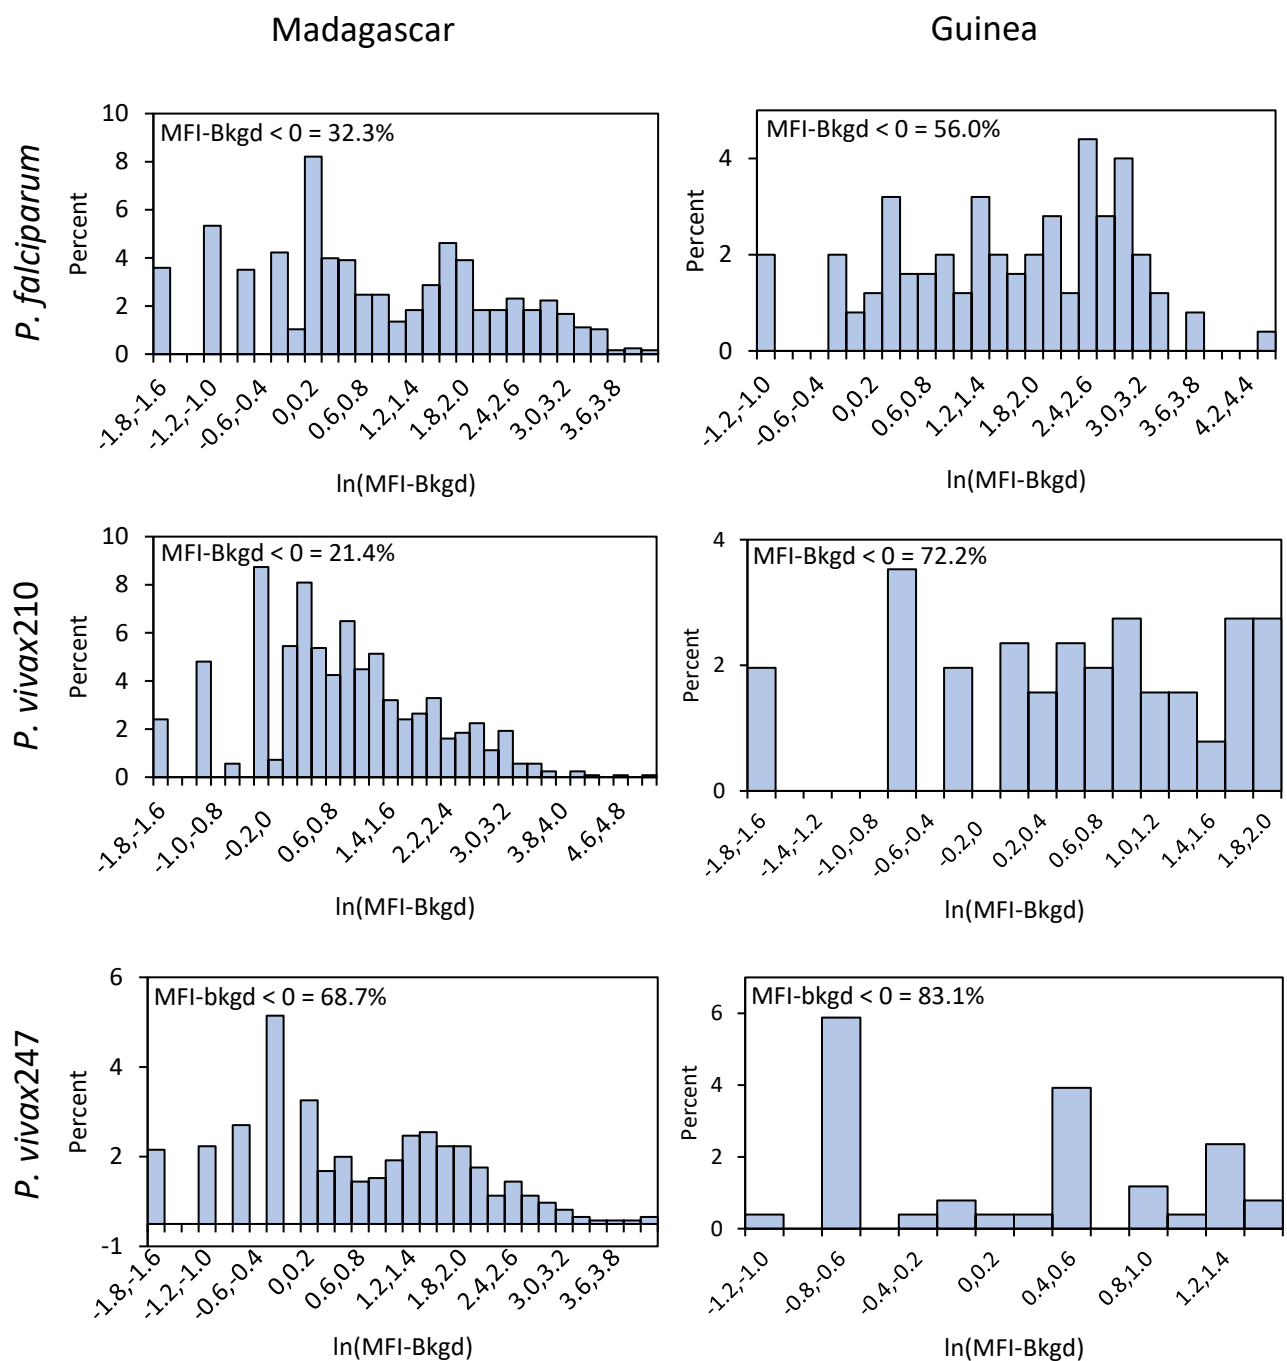

Additional file 4. Distribution of circumsporozoite multiplex-bead assay (csMBA) median fluorescence intensity minus background (MFI-Bkgd) values of negative samples from Madagascar and Guinea for *Plasmodium falciparum*, *P. vivax210* and *P. vivax247*. Values are log-transformed and are only shown for MFI-Bkgd values above zero. Those below zero are summarized in the top-left corner of each histogram.
