# Supplementary material for: Adaptation of ELISA detection of Plasmodium falciparum and Plasmodium vivax circumsporozoite proteins in mosquitoes to a multiplex bead-based immunoassay
Source: PubMed Central journal article supplement (PMC8461957; doi:10.1186/s12936-021-03910-z), 2021-09-23
Supplement: 12936_2021_3910_MOESM3_ESM.pdf [file 12936_2021_3910_MOESM3_ESM.pdf]

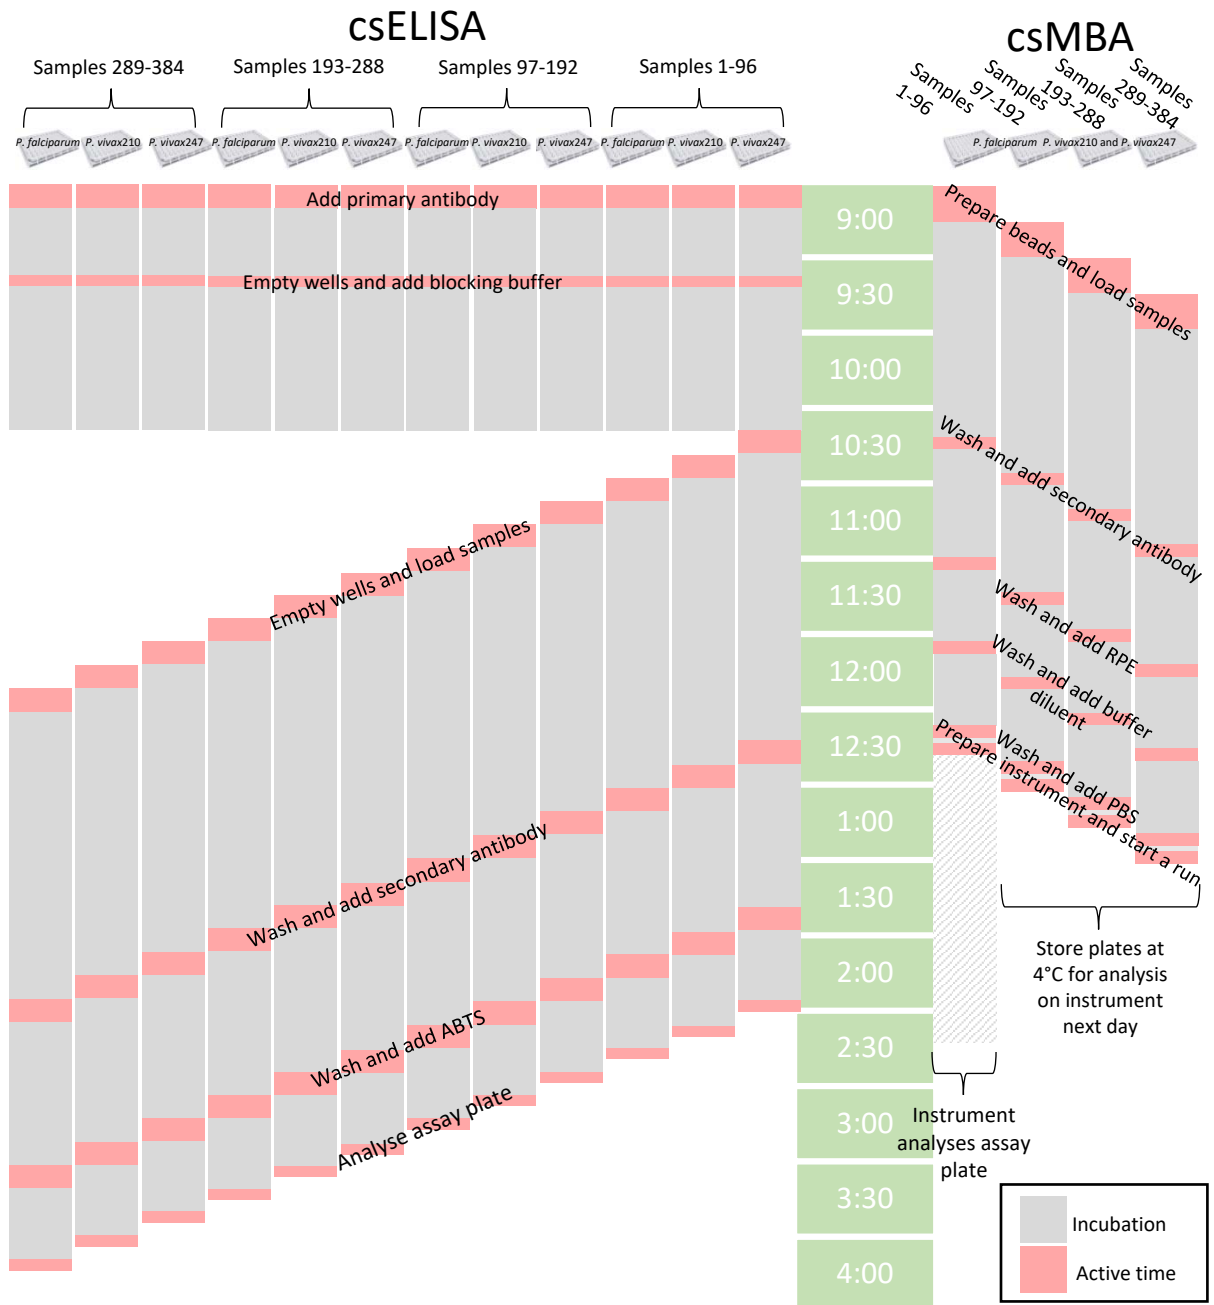

Additional file 2. Example of circumsporozoite (cs) enzyme-linked immunosorbent assay (ELISA) and cs multiplex-bead assay (MBA) workflow for assessing 384 samples with three analytes (*Plasmodium falciparum*, *P. vivax210* and *P. vivax247*).
