# Supplementary material for: Adaptation of ELISA detection of Plasmodium falciparum and Plasmodium vivax circumsporozoite proteins in mosquitoes to a multiplex bead-based immunoassay
Source: Springer Nature journal article supplement (doi:10.1186/s12936-021-03910-z), 2021-09-23
Supplement: MOESM4 [file 19691430]

| Assay                                                                     | Assay step                               | Item                                            | Example vendor              | Example catalog # | Item size  | Total cost | Cost per 96-well plate | Cost per mosquito                       | Cost to assay mosquito for <i>P. falciparum</i> , <i>P. vivax210</i> and <i>P. vivax247</i> cs-protein                                                                 | Notes                                                                                                                                |        |                                                                                                              |
|---------------------------------------------------------------------------|------------------------------------------|-------------------------------------------------|-----------------------------|-------------------|------------|------------|------------------------|-----------------------------------------|------------------------------------------------------------------------------------------------------------------------------------------------------------------------|--------------------------------------------------------------------------------------------------------------------------------------|--------|--------------------------------------------------------------------------------------------------------------|
| csELISA                                                                   | Mosquito preparation                     | Kontes® grinding tube                           | Fisher Scientific           | 05-408-121        | 500        | \$63.70    | \$12.23                | \$0.13                                  | \$0.52                                                                                                                                                                 |                                                                                                                                      |        |                                                                                                              |
|                                                                           | <i>P. falciparum</i> csELISA             | 96-well ELISA plate                             | Fisher Scientific           | 07-200-99         | 100        | \$288.50   | \$2.89                 | \$0.03                                  |                                                                                                                                                                        |                                                                                                                                      |        |                                                                                                              |
|                                                                           |                                          | ABTS®2-component peroxidase substrate           | Seracare                    | 5120-0033         | 2.7L       | \$685.00   | \$2.54                 | \$0.03                                  |                                                                                                                                                                        | 1350mL each of component A and B. 5mL each component used per 96-well plate = 270 plates per 2.7mL kit<br>One pipette tip per sample |        |                                                                                                              |
|                                                                           | <i>P. vivax210</i> csELISA               | 200µl pipette tip                               | Fisher Scientific           | 02-707-018        | 960        | \$70.00    | \$7.00                 | \$0.07                                  |                                                                                                                                                                        |                                                                                                                                      |        |                                                                                                              |
|                                                                           |                                          | 96-well ELISA plate                             | Fisher Scientific           | 07-200-99         | 100        | \$288.50   | \$2.89                 | \$0.03                                  |                                                                                                                                                                        | 1350mL each of component A and B. 5mL each component used per 96-well plate = 270 plates per 2.7mL kit<br>One pipette tip per sample |        |                                                                                                              |
|                                                                           | <i>P. vivax247</i> csELISA               | ABTS®2-component peroxidase substrate           | Seracare                    | 5120-0033         | 2.7L       | \$685.00   | \$2.54                 | \$0.03                                  |                                                                                                                                                                        | 1350mL each of component A and B. 5mL each component used per 96-well plate = 270 plates per 2.7mL kit<br>One pipette tip per sample |        |                                                                                                              |
|                                                                           |                                          | 200µl pipette tip                               | Fisher Scientific           | 02-707-018        | 960        | \$70.00    | \$7.00                 | \$0.07                                  |                                                                                                                                                                        | 1350mL each of component A and B. 5mL each component used per 96-well plate = 270 plates per 2.7mL kit<br>One pipette tip per sample |        |                                                                                                              |
|                                                                           |                                          |                                                 |                             |                   |            |            |                        |                                         |                                                                                                                                                                        | Single analyte cost                                                                                                                  | \$0.26 | Mosquito preparation plus <i>P. falciparum</i> , <i>P. vivax210</i> OR <i>P. vivax247</i> csELISA            |
|                                                                           | csMBA                                    | <i>P. falciparum</i> csMBA antibody preparation | Bio-Plex™ COOH bead         | Bio-Rad           | 171506020  | 1mL        | \$451.00               | \$4.51                                  |                                                                                                                                                                        | \$0.05                                                                                                                               | \$0.71 | Approximately 100 plates per tube of COOH beads at 10µl beads per 96-well plate                              |
|                                                                           |                                          |                                                 | xMAP® antibody coupling kit | Luminex           | 40-50016   | 1 kit      | \$269.33               | \$0.67                                  |                                                                                                                                                                        | \$0.01                                                                                                                               |        | Kit sufficient for 4 tubes of 1mL microspheres beads. 1mL beads = 100 plates at 10µL beads per 96-well plate |
| <i>P. vivax210</i> csMBA antibody preparation                             |                                          | EZ-link™ sulfo-NHS-biotin, no-weigh™            | Fisher Scientific           | PIA39256          | 10x1mg     | \$148.00   | \$0.04                 | \$0.0004                                | 267.9ng sulfo-NHS-biotin per µl resuspended antibody = 3733µl of antibody labelled per 1mg No-Weigh™ tube. 10µl labeled antibody per 96-well plate = approx 370 plates |                                                                                                                                      |        |                                                                                                              |
|                                                                           |                                          | Bio-Plex™ COOH bead                             | Bio-Rad                     | 171506018         | 1mL        | \$451.00   | \$4.51                 | \$0.05                                  | Approximately 100 plates per tube of COOH beads at 10µl beads per 96-well plate                                                                                        |                                                                                                                                      |        |                                                                                                              |
| <i>P. vivax247</i> csMBA antibody preparation                             |                                          | xMAP® antibody coupling kit                     | Luminex                     | 40-50016          | 1 kit      | \$269.33   | \$0.67                 | \$0.01                                  | Kit sufficient for 4 tubes of 1mL microspheres beads. 1mL beads = 100 plates at 10µL beads per 96-well plate                                                           |                                                                                                                                      |        |                                                                                                              |
|                                                                           |                                          | EZ-link™ sulfo-NHS-biotin, no-weigh™            | Fisher Scientific           | PIA39256          | 10x1mg     | \$148.00   | \$0.04                 | \$0.0004                                | 267.9ng sulfo-NHS-biotin per µl resuspended antibody = 3733µl of antibody labelled per 1mg No-Weigh™ tube. 10µl labeled antibody per 96-well plate = approx 370 plates |                                                                                                                                      |        |                                                                                                              |
| Mosquito preparation                                                      |                                          | Bio-Plex™ COOH bead                             | Bio-Rad                     | 171506024         | 1mL        | \$451.00   | \$4.51                 | \$0.05                                  | Approximately 100 plates per tube of COOH beads at 10µl beads per 96-well plate                                                                                        |                                                                                                                                      |        |                                                                                                              |
|                                                                           |                                          | xMAP® antibody coupling kit                     | Luminex                     | 40-50016          | 1 kit      | \$269.33   | \$0.67                 | \$0.01                                  | Kit sufficient for 4 tubes of 1mL microspheres beads. 1mL beads = 100 plates at 10µL beads per 96-well plate                                                           |                                                                                                                                      |        |                                                                                                              |
| <i>P. falciparum</i> , <i>P. vivax210</i> and/or <i>P. vivax247</i> csMBA |                                          | EZ-link™ sulfo-NHS-biotin, no-weigh™            | Fisher Scientific           | PIA39256          | 10x1mg     | \$148.00   | \$0.04                 | \$0.0004                                | 267.9ng sulfo-NHS-biotin per µl resuspended antibody = 3733µl of antibody labelled per 1mg No-Weigh™ tube. 10µl labeled antibody per 96-well plate = approx 370 plates |                                                                                                                                      |        |                                                                                                              |
|                                                                           |                                          | Kontes® grinding tube                           | Fisher Scientific           | 05-408-121        | 500        | \$63.70    | \$12.23                | \$0.13                                  |                                                                                                                                                                        |                                                                                                                                      |        |                                                                                                              |
|                                                                           | 96-well assay plate                      | Millipore                                       | MADVN6550                   | 50                | \$1,140.00 | \$22.80    | \$0.24                 |                                         |                                                                                                                                                                        |                                                                                                                                      |        |                                                                                                              |
|                                                                           | Streptavidin, R-Phycocerythrin conjugate | Fisher Scientific                               | S866A                       | 1mL               | \$331.00   | \$4.97     | \$0.05                 | 15 µL per 96-well plate                 |                                                                                                                                                                        |                                                                                                                                      |        |                                                                                                              |
|                                                                           | 200µl pipette tip                        | Fisher Scientific                               | 02-707-018                  | 960               | \$70.00    | \$7.00     | \$0.07                 | One pipette tip per sample              |                                                                                                                                                                        |                                                                                                                                      |        |                                                                                                              |
|                                                                           | Bio-Plex™ sheath fluid                   | Bio-Rad                                         | 171000055                   | 20L               | \$75.00    | \$3.75     | \$0.04                 | Approximately 1L used per 96-well plate |                                                                                                                                                                        |                                                                                                                                      |        |                                                                                                              |
|                                                                           |                                          |                                                 |                             |                   |            |            |                        | Single analyte cost                     | \$0.59                                                                                                                                                                 | Mosquito preparation plus <i>P. falciparum</i> , <i>P. vivax210</i> OR <i>P. vivax247</i> antibody preparation plus csMBA            |        |                                                                                                              |

Additional file 3. Cost analysis of consumables used in the circumsporozoite (cs) enzyme-linked immunosorbent assay (ELISA) and cs multiplex-bead assay (MBA) for assessing three analytes (*Plasmodium falciparum*, *P. vivax210* and *P. vivax247*) or a single analyte.
